# Supplementary material for: Antimicrobial Use in Hospitalised Patients with COVID-19: An International Multicentre Point-Prevalence Study
Source: MDPI journal article supplement (doi:10.3390/antibiotics11020176), 2022-01-28
Supplement: s1 [file s1]

# Point-prevalence survey of antimicrobial and antifungal treatment in patients with covid-19

|                                                                                                                             |                                             |                                                       |                                      |                                                       |               |                                                       |              |                     |                                  |       |
|-----------------------------------------------------------------------------------------------------------------------------|---------------------------------------------|-------------------------------------------------------|--------------------------------------|-------------------------------------------------------|---------------|-------------------------------------------------------|--------------|---------------------|----------------------------------|-------|
| Date                                                                                                                        | Patient's identifier                        | Ward                                                  | Days of hospitalization before PPS*: |                                                       | age           | sex                                                   | weight       | height              |                                  |       |
| <b>Chronic diseases</b>                                                                                                     | <b>Indication for antibiotic/antifungal</b> | <b>1. antibiotic or antifungal drug</b>               |                                      | <b>2. antibiotic or antifungal drug</b>               |               | <b>3. antibiotic or antifungal drug</b>               |              |                     |                                  |       |
| arterial hypertension                                                                                                       | pneumonia                                   | Generic name                                          |                                      | Generic name                                          |               | Generic name                                          |              |                     |                                  |       |
| other cardiovascular diseases                                                                                               | urinary tract infection                     | days of hospitalisation before antibiotic/antifungal* |                                      | days of hospitalisation before antibiotic/antifungal* |               | days of hospitalisation before antibiotic/antifungal* |              |                     |                                  |       |
| diabetes                                                                                                                    | bacteremia                                  | duration of treatment before PPS*                     |                                      | duration of treatment before PPS*                     |               | duration of treatment before PPS*                     |              |                     |                                  |       |
| COPD                                                                                                                        | vascular line infection                     | application mode                                      |                                      | application mode                                      |               | application mode                                      |              |                     |                                  |       |
| other lung diseases                                                                                                         | skin and skin structure infection           | dose                                                  |                                      | dose                                                  |               | dose                                                  |              |                     |                                  |       |
| neurological diseases                                                                                                       | intra-abdominal infection                   | dose interval                                         |                                      | dose interval                                         |               | dose interval                                         |              |                     |                                  |       |
| mental disorder                                                                                                             |                                             |                                                       |                                      |                                                       |               |                                                       |              |                     |                                  |       |
| liver diseases                                                                                                              | unknown site of infection                   | empirical treatment                                   |                                      | empirical treatment                                   |               | empirical treatment                                   |              |                     |                                  |       |
| chronic kidney failure                                                                                                      | bone                                        | targeted treatment                                    |                                      | targeted treatment                                    |               | targeted treatment                                    |              |                     |                                  |       |
| immune deficiency                                                                                                           | other                                       | prophylaxis:<br>medical      surgical                 |                                      | prophylaxis:<br>medical      surgical                 |               | prophylaxis:<br>medical      surgical                 |              |                     |                                  |       |
| <b>treatment of COVID-19</b>                                                                                                |                                             |                                                       |                                      |                                                       |               |                                                       |              |                     |                                  |       |
| remdesivir                                                                                                                  | other antivirals                            | corticosteroids (type), dose, duration to antibiotic  |                                      |                                                       |               |                                                       | oxygen, fiO2 |                     |                                  |       |
| <b>What triggered antibiotic/antifungal treatment: signs/symptoms      laboratory tests      imaging</b>                    |                                             |                                                       |                                      |                                                       |               |                                                       |              |                     |                                  |       |
| <b>Laboratory tests at the start of antimicrobial</b>                                                                       |                                             | C-rp                                                  | PCT                                  |                                                       |               |                                                       | WBC          |                     |                                  |       |
| <b>Chest x-ray at the start of antimicrobial (in patients with antibiotics for pneumonia): new pneumonia      worsening</b> |                                             |                                                       |                                      |                                                       |               |                                                       |              |                     |                                  |       |
| <b>In the case of targeted treatment: isolated micro-organism</b>                                                           |                                             |                                                       |                                      |                                                       |               |                                                       |              |                     |                                  |       |
| <b>type of specimen</b>                                                                                                     | sputum                                      | tracheal aspirate                                     | BAL, mini-Bal                        | blood culture                                         | urine culture | swab                                                  | biopsy       | intraoperative swab | biomarkers for fungal infections | other |

\*count the days of introduction but not the day of PPS

|                            |     |                        |      |           |                    |               |       |
|----------------------------|-----|------------------------|------|-----------|--------------------|---------------|-------|
| <b>Intensive care unit</b> |     |                        |      |           |                    |               |       |
| intubation                 | NIV | mechanical ventilation | FiO2 | pronation | vasoactive support | haemodialysis | ECCMO |
