# Supplementary material for: Antimicrobial Use in Hospitalised Patients with COVID-19: An International Multicentre Point-Prevalence Study
Source: MDPI journal article supplement (doi:10.3390/antibiotics11020176), 2022-01-28
Supplement: s1 [file s1]

**Point-prevalence survey of antimicrobial and antifungal treatment in patients with covid-19**

**Ward form**

|                                      |                                     |
|--------------------------------------|-------------------------------------|
| date                                 |                                     |
| name of the ward*                    |                                     |
| type of the ward                     | ward            Intensive care unit |
| number of hospital beds at 8.00 a.m. |                                     |
| number of patients at 8.00 a.m.      |                                     |
| number of intubated patients**       |                                     |
| number of ventilated patients**      |                                     |

\*\* name that is used in the hospital

\*\*for intensive care units
